# Supplementary material for: The Positive Side Effect of Anterior Cervical Decompression and Fusion on Axial Neck Pain
Source: PubMed Central journal article supplement (PMC11572232; doi:10.1177/21925682241254036), 2024-05-10
Supplement: sj-pdf-1-gsj-10.1177_21925682241254036.pdf [file sj-pdf-1-gsj-10.1177_21925682241254036.pdf]

**Supp 1.** Baseline characteristics of participants included in the study compared with those excluded due to a shorter follow-up than 12 months.

|                          | <i>Included</i><br>n=156 | <i>Excluded</i><br>n=79 | P     |
|--------------------------|--------------------------|-------------------------|-------|
| Age (years)              | 52.6 ± 11.3              | 53.7 ± 12.1             | 0.495 |
| Female (n, %)            | 78 (50.0%)               | 36 (45.6%)              | 0.581 |
| BMI (kg/m <sup>2</sup> ) | 24.7 ± 4.2               | 24.3 ± 3.7              | 0.556 |
| Smoker (n, %)            | 35 (22.4%)               | 31 (39.2%)              | 0.009 |
| ASA ≥3 (n, %)            | 16 (10.3%)               | 9 (11.4%)               | 0.824 |
| Cervical levels treated  | 2 [1-2]                  | 2 [1-2]                 | 0.291 |
| NDI (0-100)              | 38.6 ± 19.7              | 40.1 ± 16.8             | 0.562 |
| NRS-Neck (0-10)          | 5.6 ± 3.3                | 5.5 ± 3.2               | 0.854 |
| NRS-Arm (0-10)           | 6.8 ± 2.8                | 5.8 ± 3.5               | 0.021 |
| PCS (100-0)              | 36.1 ± 8.1               | 35.0 ± 7.4              | 0.349 |
| MCS (100-0)              | 43.2 ± 12.1              | 47.7 ± 12.2             | 0.126 |

Values are expressed in mean ± standard deviation, median [interquartile range], or n (%). ASA: American Society of Anaesthesiologist class; BMI: Body Mass Index; MCS: Mental Component Summary; NDI: Neck Disability Index; NRS: Numeric Rating Scale; PCS: Physical Component Summary.
